# Supplementary material for: Pharmacokinetic Studies of Three Alkaloids in Rats After Intragastrical Administration of Lycopodii Herba Extract by LC-MS/MS
Source: MDPI journal article supplement (doi:10.3390/molecules24101930), 2019-05-19
Supplement: s1 [file s1]

# Pharmacokinetic Studies of Three Alkaloids in Rats After Intragastrical Administration of *Lycopodii Herba* Extract by LC–MS/MS

Dongke Ma, Xiaoting Gu, Xin Wang, Youping Liu and Xin Di \*

## 1. Solution Stability

The solution stability was assessed by comparing whether there was any degradation in the solutions after storage for 24 h at room temperature and 4 weeks at 4 °C. The results of this assessment are summarized in Table S1.

**Table S1.** Stability of three alkaloids in solution under various conditions (n = 3).

| Sample   | Analytes | Concentration<br>(ng/mL) | Stability  |      |           |      |
|----------|----------|--------------------------|------------|------|-----------|------|
|          |          |                          | Short-Term |      | Long-Term |      |
|          |          |                          | RE%        | RSD% | RE%       | RSD% |
| solution | LDL      | 2.0                      | −3.8       | 3.6  | −3.1      | 7.6  |
|          |          | 8.0                      | −4.4       | 3.7  | −2.3      | 1.1  |
|          |          | 60                       | 3.0        | 2.1  | −3.2      | 2.1  |
|          | OSR      | 4.0                      | 5.3        | 3.2  | 3.9       | 2.2  |
|          |          | 16                       | −4.6       | 2.6  | −3.9      | 7.0  |
|          |          | 45                       | 5.6        | 2.9  | 4.7       | 3.1  |
|          | DOR      | 1.0                      | −4.8       | 6.8  | 4.9       | 5.8  |
|          |          | 6.0                      | −5.4       | 7.0  | −5.1      | 2.7  |
|          |          | 60                       | 4.4        | 3.5  | 2.3       | 4.0  |

## 2. Simultaneous determination of three alkaloids from *L. Herba* Extract by LC–MS/MS

Chromatographic separation was performed using the mobile phase of 0.05% formic acid (A) and methanol (B) via gradient elution. The program was performed as follows: 0–0.8 min, 82% A; 1.0–8.5 min, 70% A; 9.0–14.0 min, 82% A. The flow rate was kept at 0.2 mL/min.

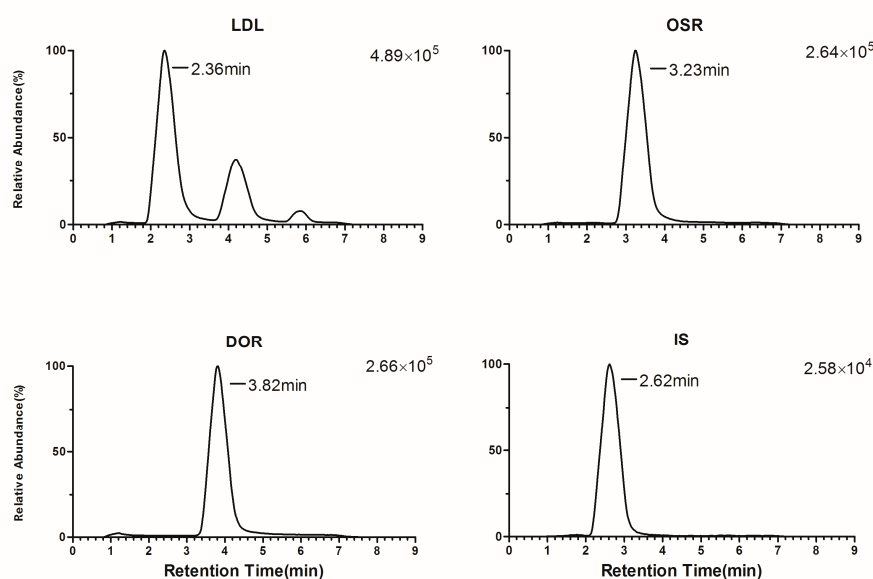

**Figure S1.** Typical chromatograms of three alkaloids and IS in *L. Herba* extract.
